# Supplementary material for: Long-term effect of sitagliptin on endothelial function in type 2 diabetes: a sub-analysis of the PROLOGUE study
Source: Cardiovasc Diabetol. 2016 Sep 13;15(1):134. doi: 10.1186/s12933-016-0438-x (PMC5022262; doi:10.1186/s12933-016-0438-x)
Supplement: Supplementary file 1 — 10.1186/s12933-016-0438-x All dataset supporting the conclusions of this article. [file 12933_2016_438_MOESM1_ESM.xlsx]

## Sheet: FMD 0-12-24 除外
Registration ID	Age	Informed concent/registration	Initiation of study drug	Date at 12 months	Date at 24 months	Hypertension 0:No 1:Yes	Dyslipidemia 0:No 1:Yes	Renal disease 0:No 1:Yes	Hepatic disease 0:No 1:Yes	Cerebrovascular disease 0:No 1:Yes	Cardiovascular disease 0:No 1:Yes	Stroke 0:No 1:Yes	Intracerebral hemorrhage 0:No 1:Yes	TIA 0:No 1:Yes	Myocardial infarction 0:No 1:Yes	Arrhythmia 0:No 1:Yes	Heart failure 0:No 1:Yes	PCI 0:No 1:Yes	CABG 0:No 1:Yes	Other CVD 0:No 1:Yes	Details in other CVD	Smoking 0:No 1:Current 2:Past 9:Unknown	current smoking	Drinking 0:No 1:Yes 9:Unknown	Height(cm)	Height(m)	Drug compliance_0M 1:Good 2:Poor	Drug compliance_3M 1:Good 2:Poor	Drug compliance_6M 1:Good 2:Poor	Drug compliance_12M 1:Good 2:Poor	Drug compliance_24M 1:Good 2:Poor	Allocation 0: Conventional 1: Sitagliptin	Dose of sitagliptin_0M 1:25mg/day 2:50Mg/day 3:100Mg/day 4:Other	Dose of sitagliptin_3M 1:25mg/day 2:50Mg/day 3:100Mg/day 4:Other	Dose of sitagliptin_6M 1:25mg/day 2:50Mg/day 3:100Mg/day 4:Other	Dose of sitagliptin_12M 1:25mg/day 2:50Mg/day 3:100Mg/day 4:Other	Dose of sitagliptin_24M 1:25mg/day 2:50Mg/day 3:100Mg/day 4:Other	Weight(kg)_0M	BMI 0M	Weight(kg)_3M	Weigt(kg)_6M	Weight(kg)_12M	BMI 12M	Weight(kg)_24M	BMI 24M	Systolic blood pressure at office(mmHg)_0M	Systolic blood pressure at office(mmHg)_3M	Systolic blood pressure at office(mmHg)_6M	Systolic blood pressure at office(mmHg)_12M
PRL-003a-01	61	2011-09-02	2011-11-07	2012-11-12	2013-11-01	1	1	0	0	0	1	0	0	0	0	0	0	0	0	1	Angina	2	0	0	165	1.65	.	1	1	1	1	0	.	.	.	.	.	88	32.3232			93	34.1598	90	33.0579	123	133	129	118
PRL-003a-02	75	2011-09-26	2011-11-21	2012-11-27	2013-11-18	1	0	0	0	0	1	0	0	0	0	0	0	1	0	0	.	2	0	1	162	1.62	1	1	1	1	1	1	2	2	2	2	2	70	26.6728	71		67	25.5296	69.9	26.6347	107	185	138	116
PRL-003a-03	75	2011-09-30	2011-12-02	2012-12-07	2013-12-09	1	0	0	0	0	0	0	0	0	0	0	0	0	0	0	.	0	0	0	157	1.57	1	1	1	1	1	0	.	.	.	.	.	66	26.7759			64	25.9645			140	167	163	164
PRL-003a-04	72	2011-10-03	2011-12-05	2012-11-12	2013-11-11	1	1	0	0	0	1	0	0	0	1	0	0	1	0	0	.	2	0	1	155	1.55	1	1	1	1	1	1	2	2	2	2	2	57	23.7253	56	56	57	23.7253	57	23.7253	138	126	139	145
PRL-003a-06	70	2011-12-14	2012-02-15	2013-02-13	2014-02-21	1	1	0	0	0	1	0	0	0	0	0	0	0	1	1	Angina	9	9	9	170	1.7	1	1	1	1	1	1	2	2	2	2	2	74	25.6055			73	25.2595	71	24.5675	110	116	114	120
PRL-003a-08	67	2012-04-06	2012-06-01	2013-06-28	2014-06-27	1	1	0	0	0	0	0	0	0	0	0	0	0	0	0	.	0	0	0	148	1.48	1	1	1	1	1	1	2	2	2	2	2	59	26.9357	60		59	26.9357	55	25.1096	157	133	151	138
PRL-003a-09	63	2012-04-09	2012-05-25	2013-05-13	2014-06-02	1	0	0	0	0	0	0	0	0	0	0	0	0	0	0	.	2	0	1	170	1.7	1	1	1	1	1	0	.	.	.	.	.	89	30.7958			85	29.4118	84.5	29.2388	141	132	139	134
PRL-005a-02	81	2011-03-01	2011-03-01	2012-03-05	2013-02-20	0	0	0	0	0	1	0	0	0	1	0	0	0	0	0	.	0	0	9	144.1	1.441	1	1	1	1	1	0	.	.	.	.	.	46	22.1529	48	48	48.5	23.3568	50.2	24.1755	134	140	136	107
PRL-005a-08	68	2011-04-04	2011-05-03	2012-05-15	2013-06-03	1	1	0	0	1	0	0	0	1	0	0	0	0	0	0	.	9	9	.	165	1.65	1	1	1	1	1	0	.	.	.	.	.	76	27.9155	79.7	78.2	78.4	28.7971	80	29.3848	140	120	128	138
PRL-005a-09	59	2011-04-11	2011-05-27	2012-06-14	2013-05-31	0	0	0	0	0	0	0	0	0	0	0	0	0	0	0	.	9	9	.	152.9	1.529	1	.	1	1	1	0	.	.	.	.	.	55.2	23.6115	53.4	55.8	53.6	22.9271	53.2	22.756	108	120	144	132
PRL-005a-10	64	2011-04-14	2011-04-28	2012-04-26	2013-04-11	1	1	0	0	0	0	0	0	0	0	0	0	0	0	0	.	9	9	.	150	1.5	1	1	1	1	1	0	.	.	.	.	.	69.8	31.0222	65.8	66.6	64	28.4444	68.4	30.4	154	146	180	158
PRL-005a-12	64	2011-04-18	2011-04-18	2012-04-23	2013-05-08	1	1	0	0	0	1	0	0	0	1	0	0	1	0	0	.	2	0	9	159.8	1.598	1	1	1	1	1	1	2	3	3	3	3	73.3	28.7045	73	73	73.6	28.822	73	28.587	136	131	130	147
PRL-005a-13	70	2011-04-25	2011-04-25	2012-05-07	2013-04-24	1	1	0	0	0	1	0	0	0	0	0	0	0	0	1	Pacemaker implantation	0	0	0	145.2	1.452	1	1	1	1	1	1	2	3	3	3	3	50	23.7157	56	56	53.7	25.4707	54.6	25.8976	117	120	126	150
PRL-005a-14	70	2011-05-02	2011-06-07	2012-06-21	2013-06-07	1	1	0	0	0	0	0	0	0	0	0	0	0	0	0	.	9	9	.	161.4	1.614	1	1	1	1	1	1	2	2	2	3	3	78.3	30.0576	80.6	80.2	81.8	31.4012	77.4	29.7121	138	152	178	150
PRL-005a-15	64	2011-04-20	2011-05-25	2012-05-23	2013-05-15	0	1	1	0	0	0	0	0	0	0	0	0	0	0	0	.	0	0	0	153	1.53	1	1	1	1	1	1	2	2	2	2	2	59	25.204	59.2	61.2	59	25.204	57.6	24.6059	121	112	130	112
PRL-005a-16	46	2011-05-11	2011-06-08	2012-05-02	2013-05-22	1	1	0	0	0	0	0	0	0	0	0	0	0	0	0	.	1	1	1	151.2	1.512	1	1	1	1	1	0	.	.	.	.	.	75	32.8063	75.6	78.4	72.4	31.669	73.4	32.1065	122	114	140	112
PRL-005a-18	76	2011-04-20	2011-06-01	2012-05-02	2013-05-22	0	0	1	0	0	0	0	0	0	0	0	0	0	0	0	.	2	0	9	160	1.6	1	1	1	1	1	1	2	2	2	2	2	60	23.4375	60.4	60.2	58.6	22.8906	57	22.2656	132	118	150	132
PRL-005a-19	53	2011-05-16	2011-06-27	2012-07-09	2013-06-14	1	1	0	0	0	0	0	0	0	0	0	0	0	0	0	.	9	9	.	156.1	1.561	1	1	1	1	1	1	2	2	3	3	3	72.5	29.7531	74.6	75.1	76.2	31.2715	74.4	30.5328	138	140	138	142
PRL-005a-20	78	2011-05-16	2011-06-13	2012-06-11	2013-08-06	1	1	0	0	1	0	1	0	0	0	0	0	0	0	0	.	9	9	.	144	1.44	1	1	1	1	1	0	.	.	.	.	.	61	29.4174		60.8	57.5	27.7296	58	27.9707	119	126	110	133
PRL-005a-21	69	2011-05-30	2011-07-11	2012-08-13	2013-07-22	0	0	0	0	0	1	0	0	0	0	0	1	0	0	0	.	1	1	0	145	1.45	1	.	1	1	1	0	.	.	.	.	.	45	21.4031	43.8	43.5	44	20.9275	44	20.9275	121	96	100	114
PRL-005a-24	73	2011-06-06	2011-07-11	2012-06-25	2013-09-04	1	0	1	0	0	1	0	0	0	0	0	0	0	0	1	Pulmonary thromboembolism	9	9	.	177	1.77	1	.	1	1	1	0	.	.	.	.	.	86.8	27.706		85.8	86.8	27.706	78	24.8971	109	116	130	151
PRL-005a-25	67	2011-05-26	2011-06-29	2012-07-17	2013-07-18	0	1	1	0	0	0	0	0	0	0	0	0	0	0	0	.	2	0	0	171	1.71	1	1	1	1	1	0	.	.	.	.	.	72	24.623	73.2	74.8	74	25.3069	75.2	25.7173	107	104	120	124
PRL-005a-26	53	2011-07-04	2011-08-19	2012-08-20	2013-08-09	1	1	0	0	0	0	0	0	0	0	0	0	0	0	0	.	9	9	.	175.2	1.752	1	1	1	1	1	0	.	.	.	.	.	92.8	30.2329	94.4	96.8	97	31.6012	98.2	31.9921	120	120	120	124
PRL-005a-27	66	2011-08-01	2011-09-05	2012-09-25	2013-10-16	1	1	1	0	0	1	0	0	0	0	0	0	1	0	0	.	2	0	0	173.7	1.737	.	1	1	1	1	1	2	2	3	3	3	78.7	26.0841	78.8	79.8	77.8	25.7858	82.4	27.3104	120	136	134	133
PRL-005a-28	65	2011-08-08	2011-09-12	2013-01-21	2013-09-24	0	0	0	0	1	1	1	0	0	0	1	0	0	0	1	Pacemaker implantation	0	0	0	152	1.52	.	1	1	1	1	1	2	2	2	2	2	44	19.0443	44	44	44.5	19.2607	45	19.4771	129	110	170	143
PRL-005a-29	72	2011-09-07	2011-10-05	2012-11-02	2013-10-08	1	1	0	0	0	1	0	0	0	0	1	0	0	0	1	Mitral valve replacement	0	0	0	152	1.52	.	1	1	1	1	1	2	2	.	2	2	64.6	27.9605	67	68.6	64.6	27.9605	62.5	27.0516	133	130	126	124
PRL-005a-30	64	2011-10-12	2011-11-09	2012-11-27	2013-10-11	1	1	1	0	0	1	0	0	0	0	1	0	0	0	1	Post operation of mitral valve and ASD, Pacemaker implantation	1	1	0	157.3	1.573	1	1	1	1	1	0	.	.	.	.	.	57.2	23.1174	55	55	56.5	22.8345	54.2	21.9049	124	112	108	108
PRL-005b-03	64	2011-12-07	2012-01-11	2013-01-18	2014-02-07	1	1	0	1	0	1	0	0	0	0	1	0	0	0	0	.	1	1	1	167.7	1.677	1	1	1	1	1	0	.	.	.	.	.	63.3	22.508	61	61.6	63.8	22.6858	64.2	22.8281	114	134	122	126
PRL-005b-04	62	2012-06-26	2012-07-05	2013-07-19	2014-07-15	0	0	0	0	0	1	0	0	0	0	1	1	0	0	0	.	1	1	1	168.8	1.688	1	1	1	1	1	0	.	.	.	.	.	50.4	17.6883	53	55.2	54.5	19.1272	54.6	19.1623	142	120	112	130
PRL-005b-05	63	2012-07-04	2012-07-15	2013-09-25	2014-06-19	1	1	0	0	0	1	0	0	0	1	1	0	1	0	0	.	2	0	0	161.3	1.613	1	1	1	1	1	1	2	2	2	2	2	83.3	32.0167	83.6	80.4	78.9	30.3255	73.7	28.3269	130	126	138	127
PRL-005b-06	66	2012-07-09	2012-07-09	2013-09-12	2014-06-10	1	1	0	0	0	1	0	0	0	0	0	0	1	0	1	ASO	2	0	1	163.8	1.638	1	1	1	1	1	0	.	.	.	.	.	73	27.2079	72.2	73	71.2	26.537	70	26.0898	120	138	134	110
PRL-005c-01	40	2012-02-06	2012-02-27	2013-02-18	2014-02-27	1	1	0	1	0	0	0	0	0	0	0	0	0	0	0	.	0	0	1	175	1.75	1	1	1	1	1	0	.	.	.	.	.	116	37.8776	116	114	117	38.2041	110	35.9184	128	128	124	128
PRL-005c-02	70	2012-02-29	2012-03-14	2013-03-14	2014-03-05	1	1	1	0	0	1	0	0	0	0	0	0	0	0	0	.	0	0	0	152	1.52	1	1	1	1	1	1	2	2	3	3	3	67	28.9993	69.6	71.4	67.8	29.3456	68.4	29.6053	122	126	118	122
PRL-005c-03	75	2012-02-27	2012-04-09	2013-04-08	2014-05-09	0	1	0	0	0	0	0	0	0	0	0	0	0	0	0	.	0	0	0	166	1.66	1	1	1	1	1	1	2	2	2	2	3	73	26.4915	72.4	72.4	73.4	26.6367	74.2	26.927	138	142	132	132
PRL-027a-01	82	2012-01-19	2012-07-12	2013-07-19	2014-08-08	1	1	0	0	0	0	0	0	0	0	0	0	1	0	1	.	0	0	0	143	1.43	1	1	1	1	1	1	2	2	2	2	2	65	31.7864	61	72	63	30.8084	62	30.3193	146	130	130	136
[truncated: 232 more columns]
